# Supplementary material for: FLOWERING LOCUS T mRNA is synthesized in specialized companion cells in Arabidopsis and Maryland Mammoth tobacco leaf veins
Source: PubMed Central journal article supplement — Proc Natl Acad Sci U S A. 2018 Feb 26;115(11):2830–5. doi: 10.1073/pnas.1719455115 (PMC5856545; doi:10.1073/pnas.1719455115), 2018-02-26
Supplement: pnas.201719455SI.pdf [file pnas.201719455SI.pdf]

# Supporting Information

Chen et al. 10.1073/pnas.1719455115

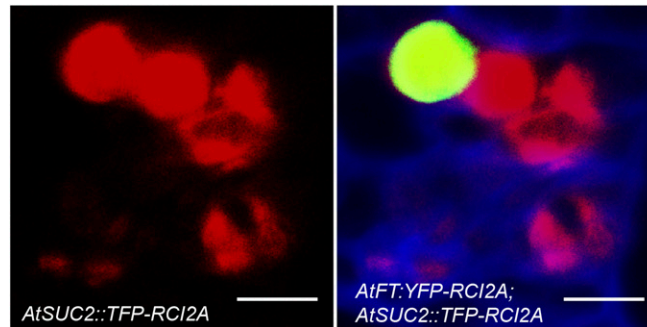

**Fig. S1.** The *AtFT* and *AtSUC2* promoters are active in the same cell in the minor vein phloem of an *Arabidopsis* leaf. The vein, from a transverse hand section, was also stained with Calcofluor white (Right). Red cells are companion cells, as determined by the *AtSUC2::TFP-RCI2A* construct. One companion cell in the top left quadrant of the vein also activated the *AtFT* promoter (Right, green fluorescence). Other cell types in the vein (i.e., sieve elements and phloem parenchyma cells) cannot be resolved in this image. (Scale bars: 5  $\mu$ m.)

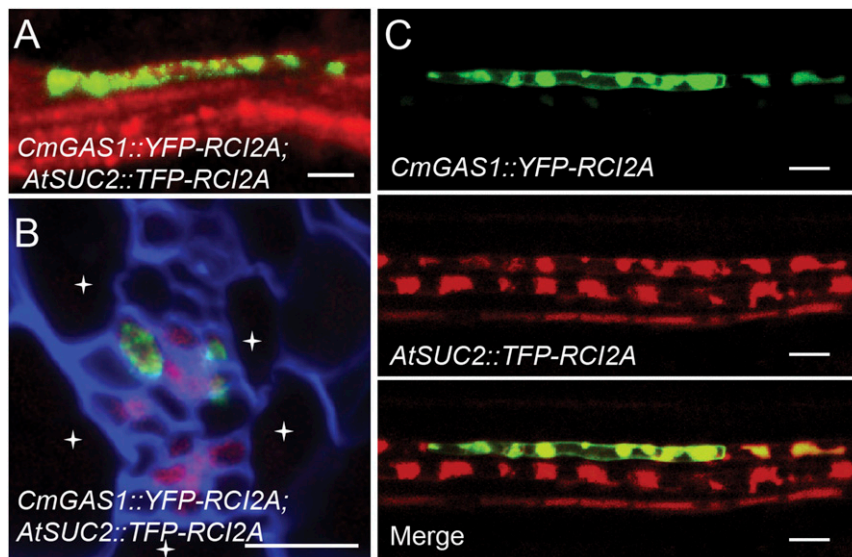

**Fig. S2.** Localization of *CmGAS1* promoter activities in *Arabidopsis* veins by confocal microscopy in paradermal (A), transverse (B), and longitudinal (C) views. Tissue in A was cleared with ClearSee, whereas tissues in B and C are hand sections. Cell walls are stained blue by Calcofluor white. B, bundle sheath cell. Companion cells express *AtSUC2::TFP-RCI2A* (red), and a subset of companion cells express *CmGAS1::YFP-RCI2A* (green). (Scale bars: 10  $\mu$ m.)

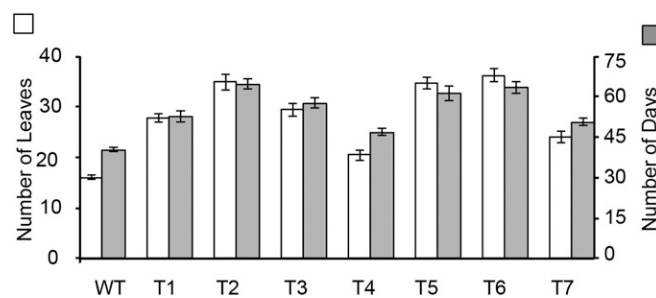

**Fig. S3.** Plants expressing the diphtheria toxin gene *CmGAS1::DT-A* are late flowering. Phenotype of WT and transgenic (T1–T7) plants expressing the diphtheria toxin gene *CmGAS1::DT-A*. The total number of leaves, and number of days, required for flowering in long days were counted. In every case, means were statistically different from WT based on two-tailed *t* tests with equal variance ( $P < 0.05$ ). Error bars represent SE.  $n = 13$ –15 plants.





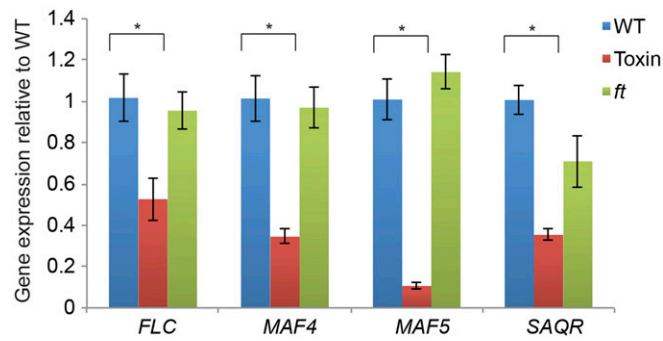

Fig. S7. Fold change in the expression of flowering-related genes in *CmGAS1::DT-A* line T6 and *ft* mutant. \*Significant difference ( $P < 0.05$ ). Error bars represent SE ( $n = 3$ ).

Table S1. Primers used in this study

| Primer       | Sequence                                              |
|--------------|-------------------------------------------------------|
| pUC19-GASF   | AATGTTCTAGATCTAGATGACTTGGATTAATT                      |
| pUC19-GASR   | AATGTGAGCTCATTTGACTTTGGTGTCTTTGAA                     |
| pUC-ToxinF   | GACGGTACCATGGATCCTGATGATGTTGTTGATTC                   |
| pUC-ToxinR   | AGTGAGCTCTCAAGATCGCCTGACACGATTCCTGC                   |
| 8xhoGASF     | AGCTAGTCGACTCTAGCCTCTAGATGACTTGGATTAATTCCTAACAAGAA    |
| 8speGASR     | CTGGGAGGCCTGGATCGACTAGTATTGACTTTGGTGTCTTTGAAACAACAA   |
| o2suc2pxhoF  | AATTGGGGCCCAACGTTCCCCATCCCCGACCCTAATGT                |
| suc2pTFP     | TTTTCTTACTTTCTTGGTTTGTCAAATATGTACCCATACGATGTCCAGA     |
| TFPsuc2p     | TCTGGAACATCGTATGGGTACATATTTGACAAACCAAGAAAGTAAGAAAA    |
| o2TFPRClpstR | GTA AAAAGGTACCGAGCTCCTGCAGCTCATTGGTGAGGACATAAAATGGCG  |
| 8FTpxhoF     | AGCTAGTCGACTCTAGCCGATTACCTCCCAGCACCAAGACAAG           |
| 8FTpxhoR     | GCCTGGGCCCGCGCGCCTCGAGCATCTTTGATCTTGAACAAACAGGTGGTTTC |
| AtSAQR-F     | TGGCAAAGCCCGTCTAAT                                    |
| AtSAQR-R     | CTAGTGAGCCTGCATGTCTTC                                 |
| AtMAF5-F     | TGTGTCGGAAGAGTGAAGCCAT                                |
| AtMAF5-R     | CTGATGATCTTGGCCATGCTGT                                |
| AtMAF4-F     | GAGAGGAGAACCAGAGTTTGAC                                |
| AtMAF4-R     | CGTTGGTGATGGTGGTTACT                                  |
| AtFLC-F      | ATCATCATGTGGGAGCAGAAG                                 |
| AtFLC-R2     | GATTTCAACCGCCGATTTAAGG                                |
| AtCO-F2      | CTTTCAGCTCCATGACCACTAC                                |
| AtCO-R2      | CAACCTCCTTGGCATCCTTATC                                |
| AtActin2-F   | TCCCTCAGCACATTCAGCAGAT                                |
| AtActin2-R   | AACGATTCCTGGACCTGCCTCATC                              |
| NtFT1_2-F    | TTGGATCGAGAGGTTGTGAATG                                |
| NtFT1-R      | GCAACAGGCGAATTGAGATTATG                               |
| NtFT2-R      | GGCAAATTGAGACCGTGAAAC                                 |
| NtFT3-F      | GAGCACACTTCGGGAATGAA                                  |
| NtFT3-R      | TCTCGAGTCAATTGTCGAAACA                                |
| NtFT4-F      | TCCCAGCAACTACAGATACAAG                                |
| NtFT4-R      | GAAACGGGCAAACCAAGATT                                  |
| NtL25-F      | AAAGAAGATTAAGGATGCCGTG                                |
| NtL25-R      | GCATCATAGTCAGGAGTCAACC                                |

Dataset S1. RNAseq comparison of toxin-deleted and WT leaves at 8 h and 16 h. LogFC, logarithm of fold changes in gene expression; LogCPM, logarithm of counts per million reads; FDR, false discovery rate

[Dataset S1](#)
